# Supplementary material for: Induced secretion system mutation alters rhizosphere bacterial composition in Sorghum bicolor (L.) Moench
Source: PubMed Central journal article supplement (PMC7813745; doi:10.1007/s00425-021-03569-5), 2021-01-18

Article title: Induced secretion system mutant alters rhizosphere bacterial composition in *Sorghum bicolor* (L.) Moench.

Journal name: Planta

Authors: Vimal Kumar Balasubramanian, Lavanya Dampanaboina, Chris Cobos, Ning Yuan, Zhanguo Xin and Venugopal Mendu

a.

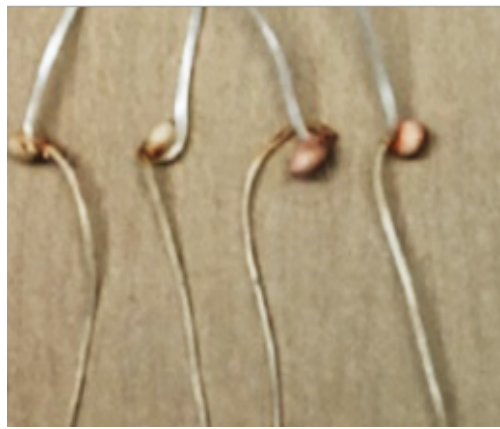

**BTx623**

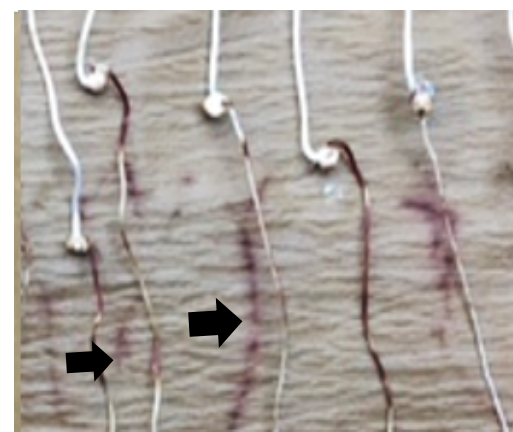

**RedRoot**

b.

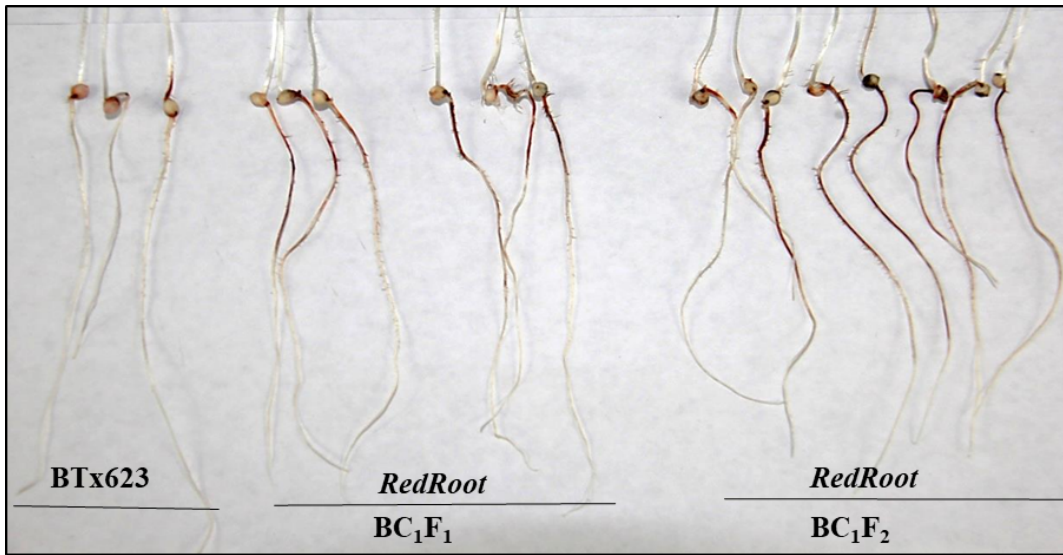

**BTx623**

**RedRoot**

**RedRoot**

**BC<sub>1</sub>F<sub>1</sub>**

**BC<sub>1</sub>F<sub>2</sub>**

c.

| <b>Chi-square probability test</b> |              |                 |                    |                       |
|------------------------------------|--------------|-----------------|--------------------|-----------------------|
| Expected (E)                       | Observed (O) | Deviation (O-E) | (O-E) <sup>2</sup> | (O-E) <sup>2</sup> /E |
| 147                                | 143          | -4              | 16                 | 0.10884354            |
| 49                                 | 53           | 4               | 16                 | 0.32653061            |
|                                    |              |                 |                    | 0.43537415            |
|                                    |              |                 | Degree of freedom  | 1                     |

**BTx623**

**Dark RedRoots**

**Medium RedRoots**

**Pale RedRoots**

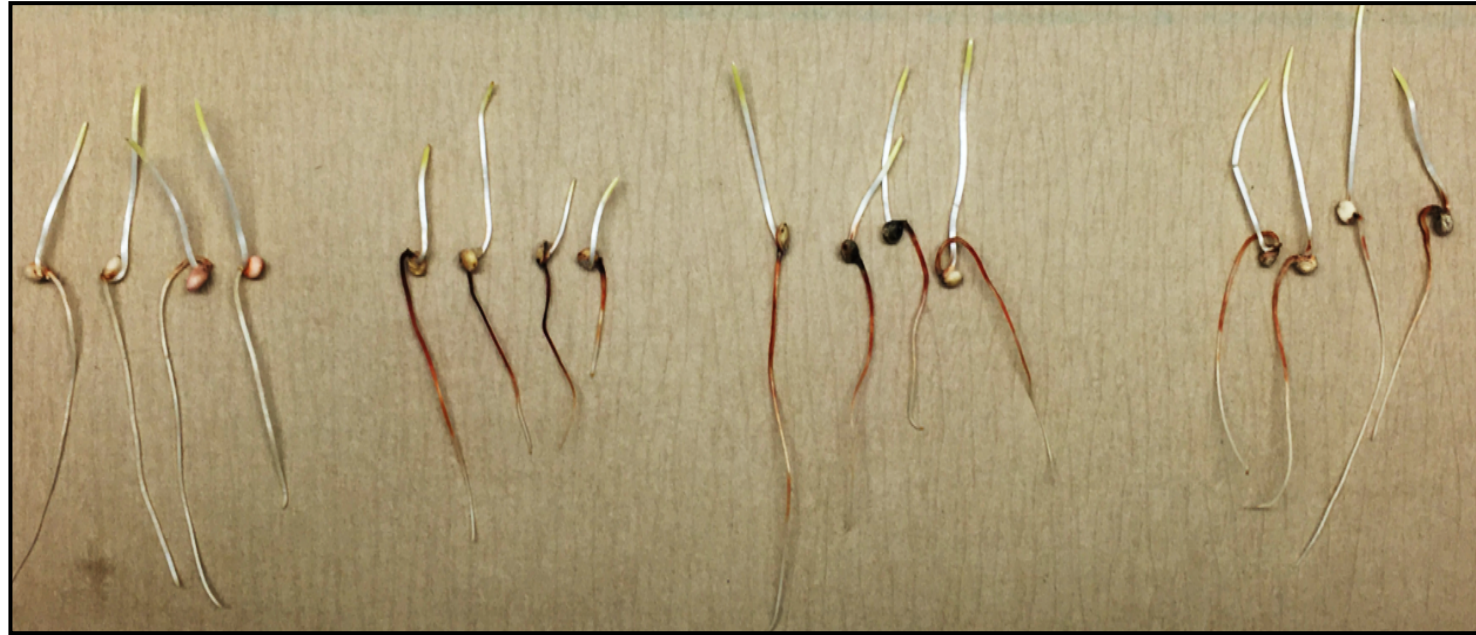

**Hypocotyl Length**

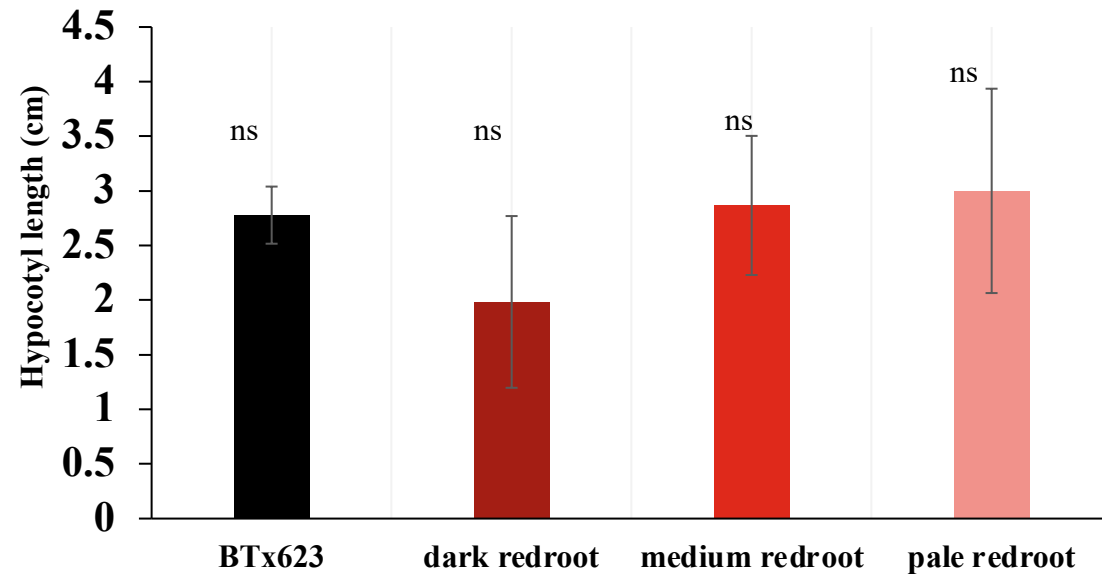

**Root Length**

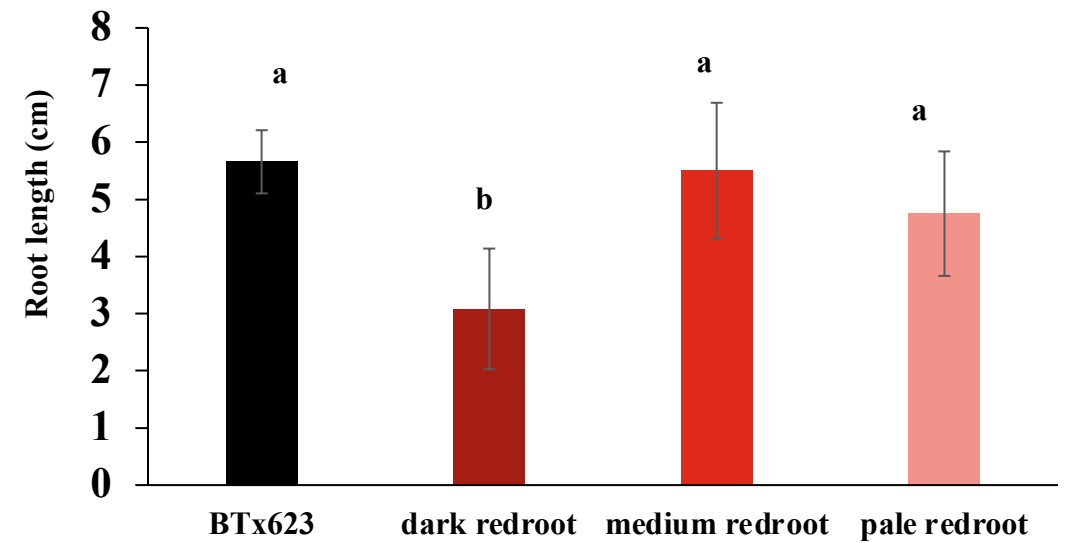

**BTx623 (well-watered)**

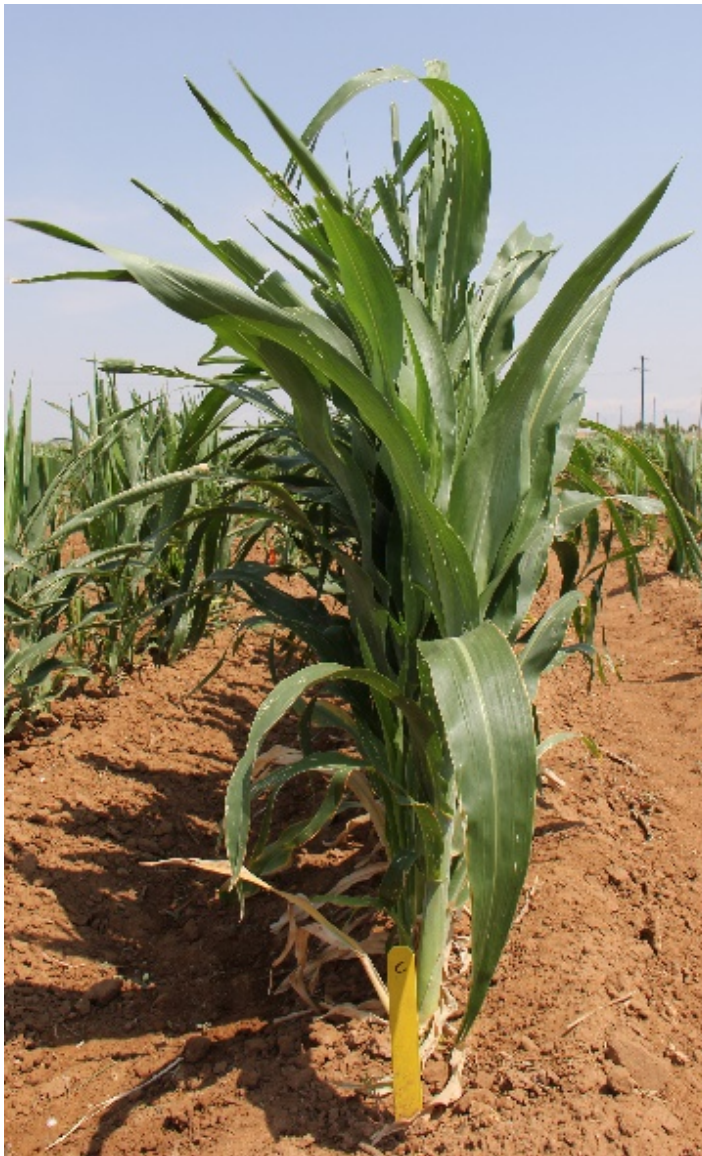

**BTx623 (water deficit)**

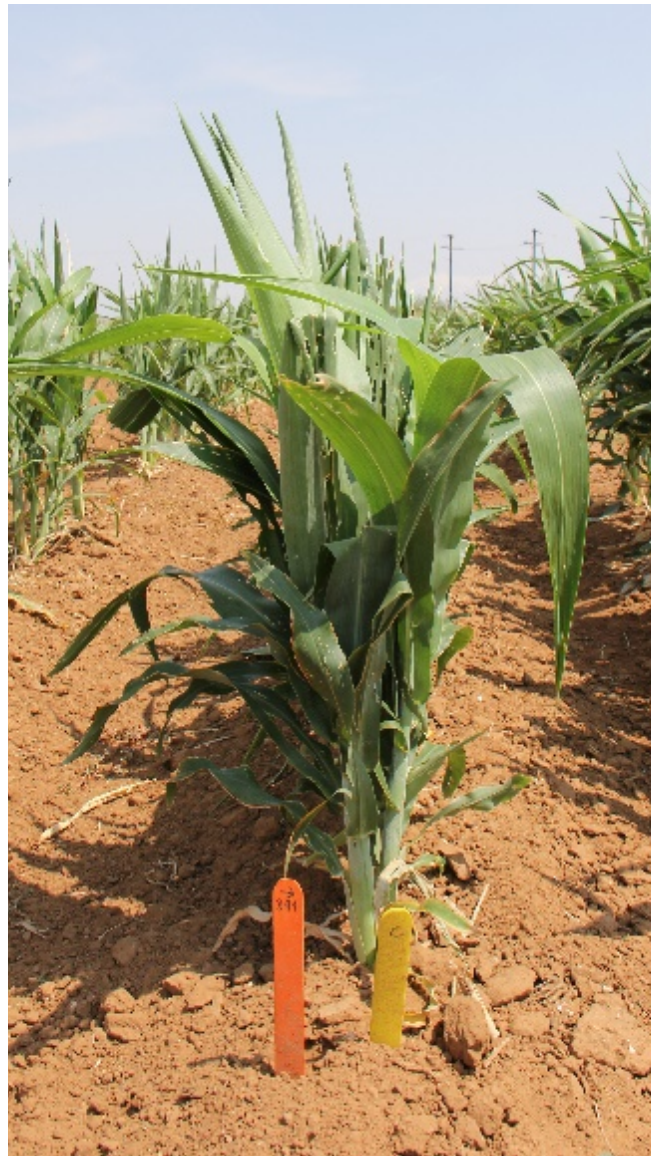

**RedRoot (well-watered)**

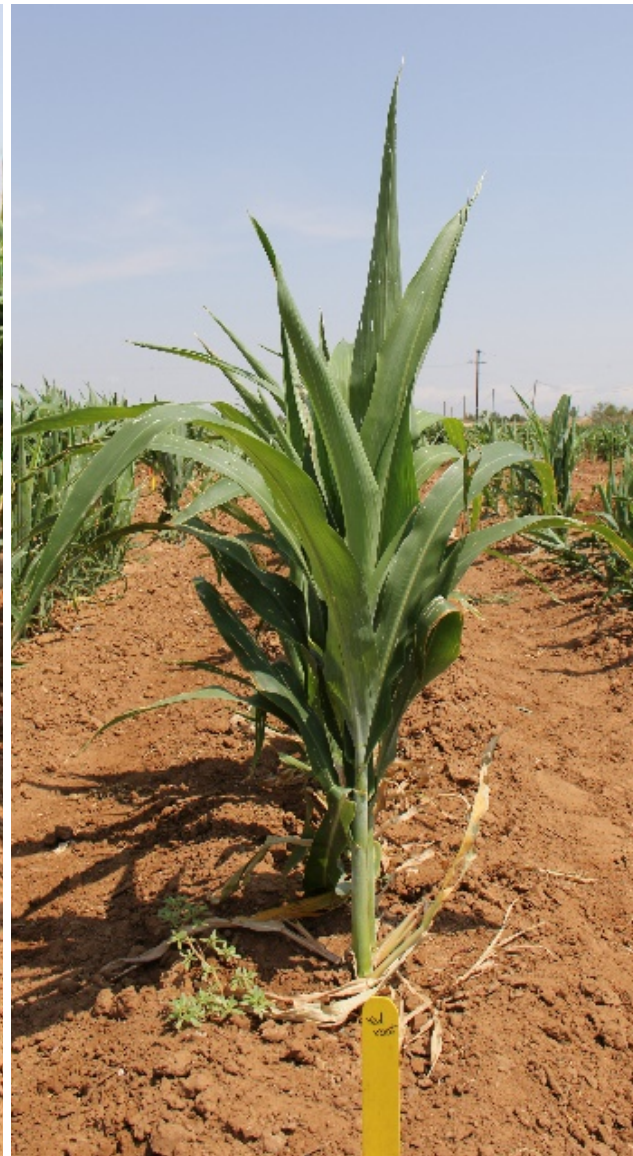

**RedRoot (water deficit)**

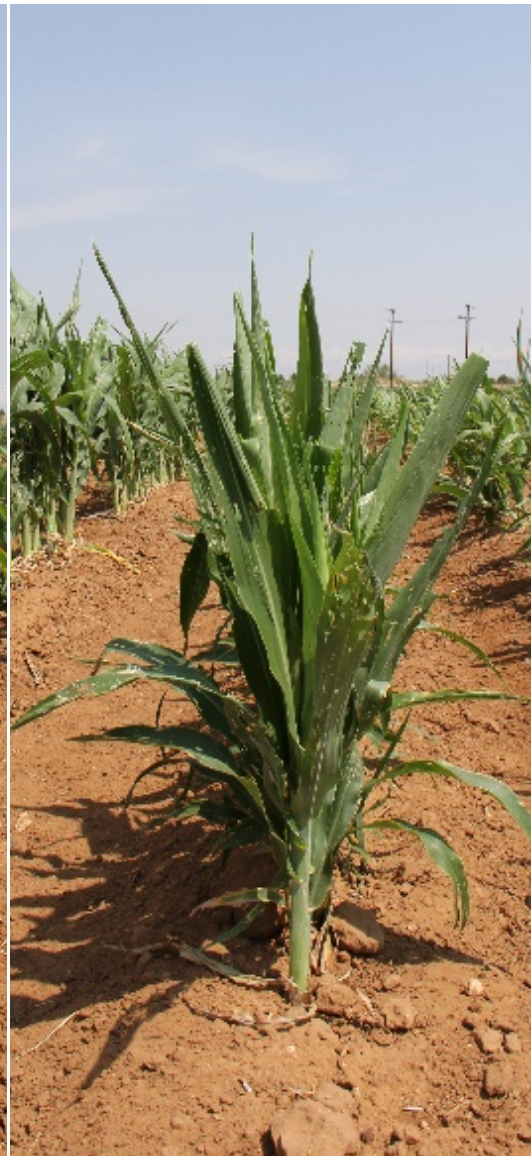

# Bacteria – Phyla abundance

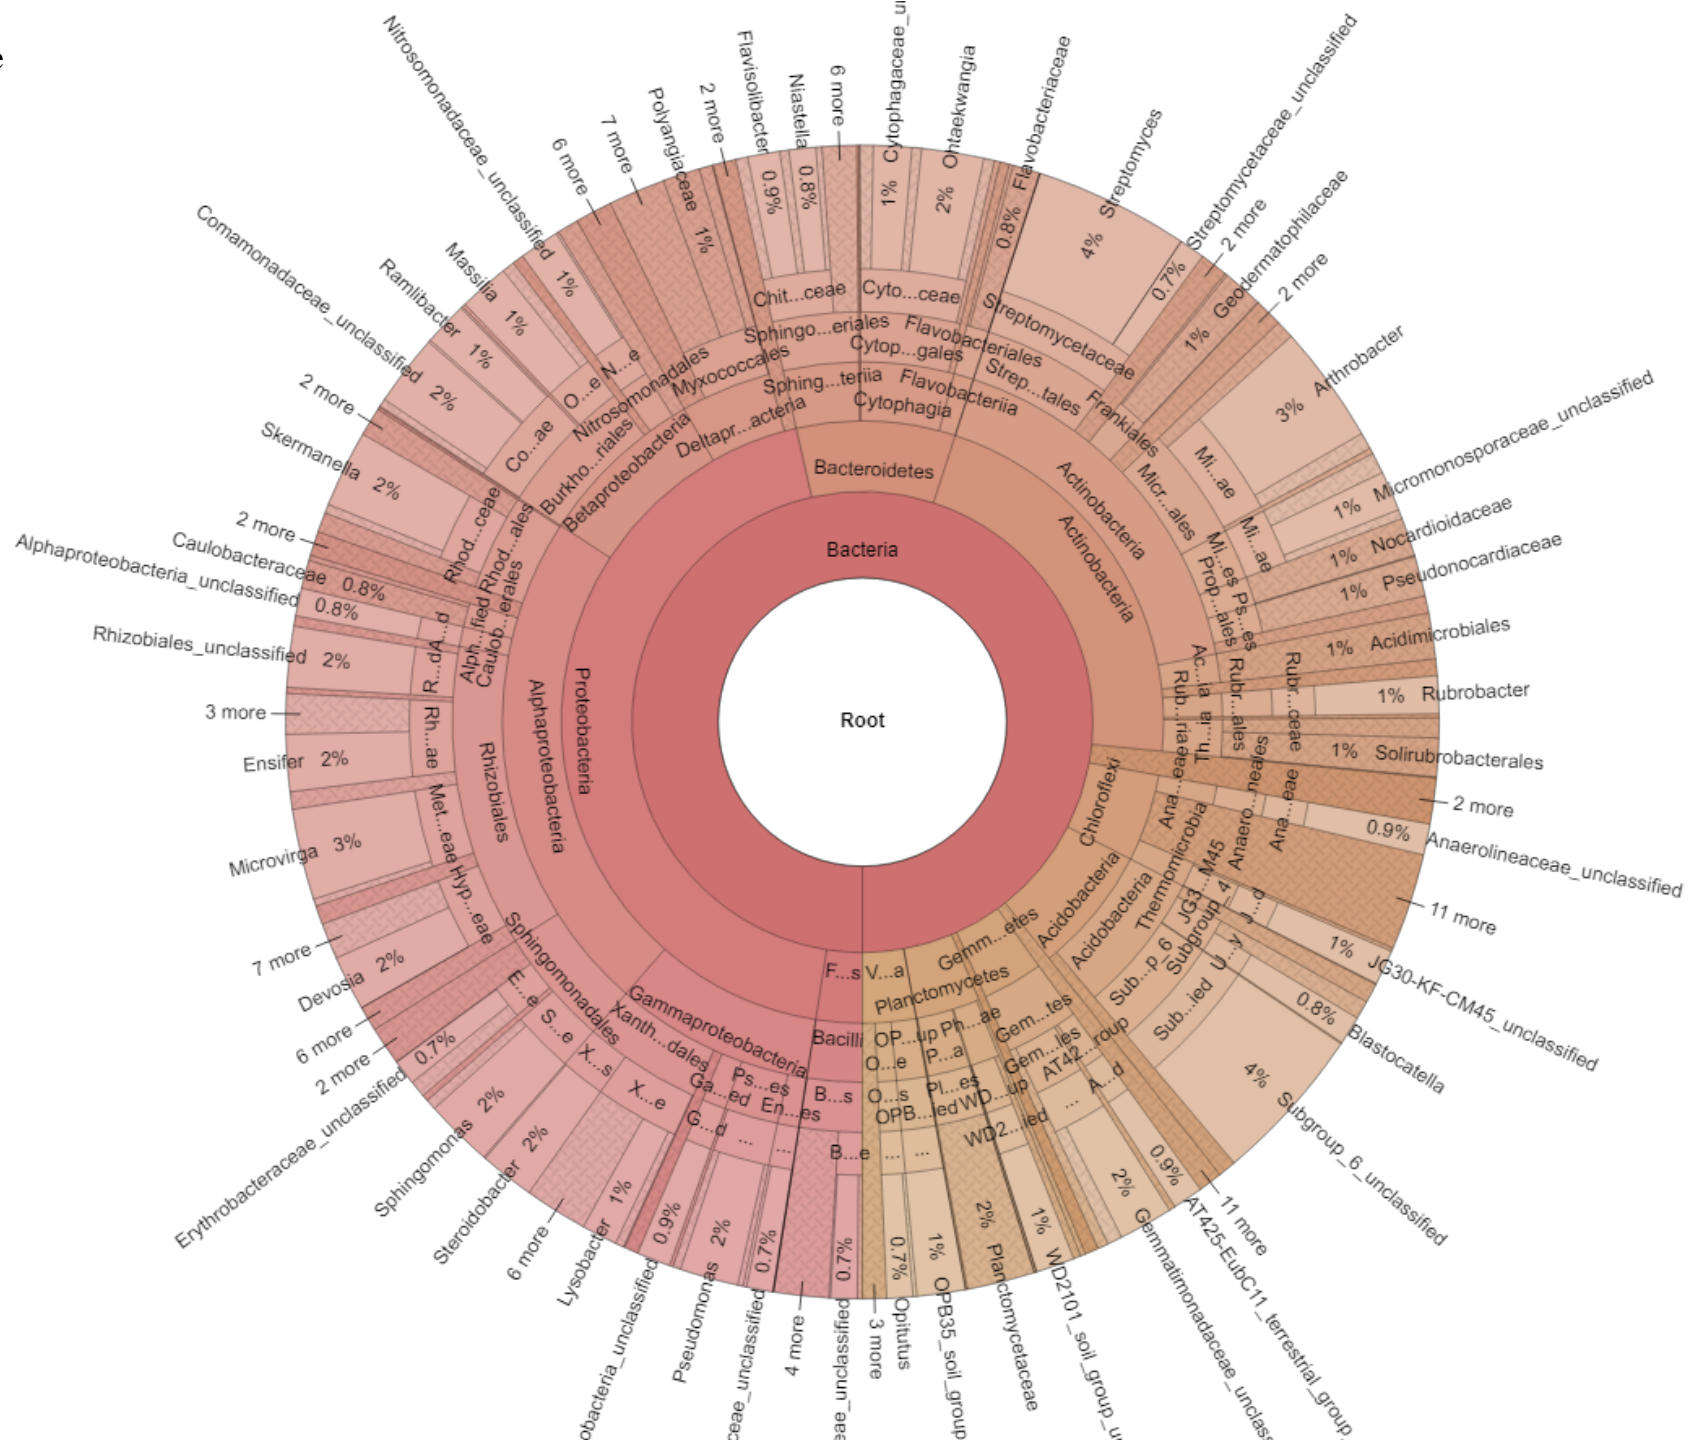

# Fungi – Phyla abundance

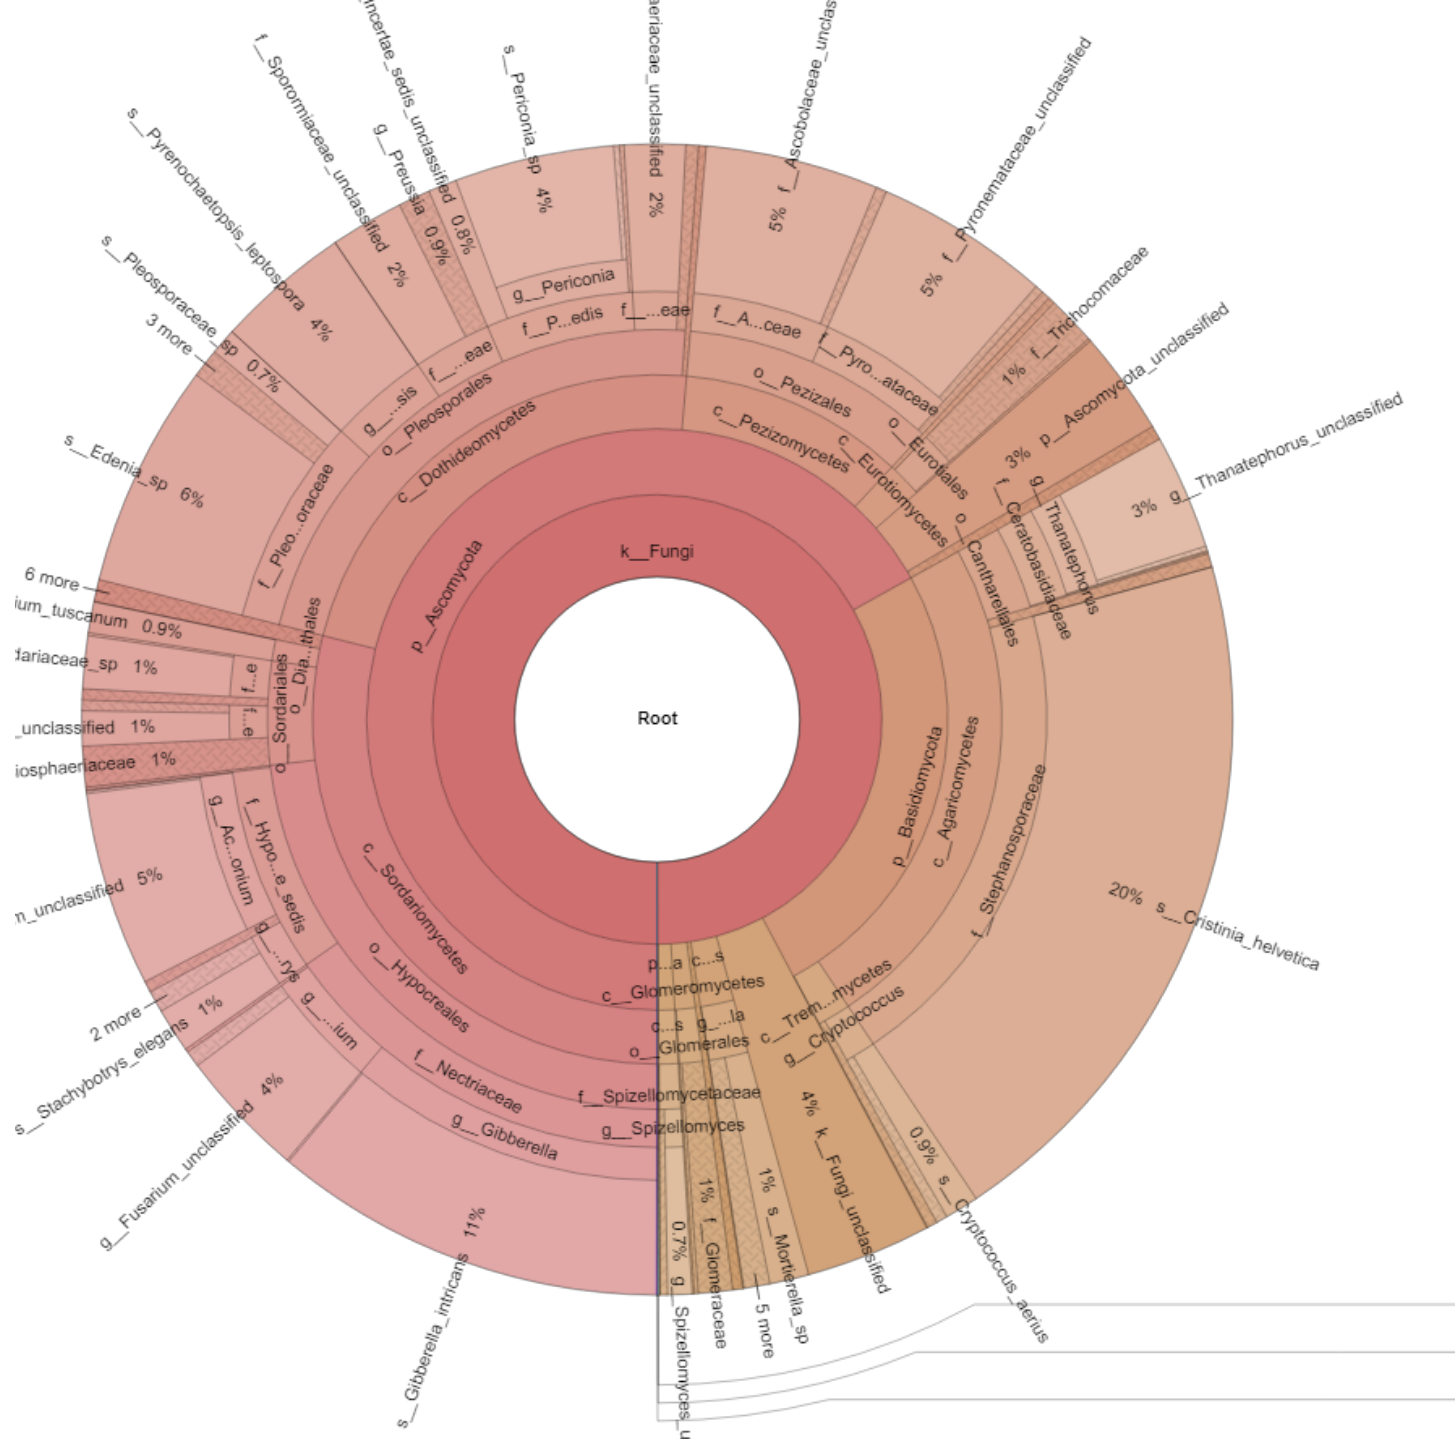

Supplement: 425_2021_3569_MOESM1_ESM.pdf [file 425_2021_3569_MOESM1_ESM.pdf]
